CORRECTION

# Correction: Cost-Effectiveness Analysis of Test-Based versus Presumptive Treatment of Uncomplicated Malaria in Children under Five Years in an Area of High Transmission in Central Ghana

The *PLOS ONE* Staff

In [Table 3](#), there are several missing data points. Please see the corrected [Table 3](#) here. The publisher apologizes for the errors.

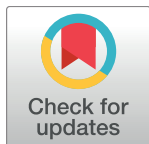

## OPEN ACCESS

**Citation:** The *PLOS ONE* Staff (2017) Correction: Cost-Effectiveness Analysis of Test-Based versus Presumptive Treatment of Uncomplicated Malaria in Children under Five Years in an Area of High Transmission in Central Ghana. *PLoS ONE* 12(1): e0170848. doi:10.1371/journal.pone.0170848

**Published:** January 20, 2017

**Copyright:** © 2017 The PLOS ONE Staff. This is an open access article distributed under the terms of the [Creative Commons Attribution License](#), which permits unrestricted use, distribution, and reproduction in any medium, provided the original author and source are credited.

**Table 3. Sensitivity to selected parameters of the incremental cost-effectiveness ratio (ICER) of replacing clinical diagnosis of malaria by rapid diagnostic tests in public health centres in Kintampo District, Ghana, July 2010-June 2012 (US\$1 = GHS1.51).**

| ----- ICER in US\$ -----                                  |               |          | ----- ICER in US\$ -----                                                           |               |          |
|-----------------------------------------------------------|---------------|----------|------------------------------------------------------------------------------------|---------------|----------|
| Parameter <sup>&amp;</sup>                                | Health sector | Societal | Parameter <sup>&amp;</sup>                                                         | Health sector | Societal |
| <i>Malaria prevalence among children with fever (50%)</i> |               |          | <i>Health centre cost per visit excl drugs and mRDTs</i>                           |               |          |
| 20%                                                       | 13.0          | 7.4      | 40% lower                                                                          | 13.9          | 6.3      |
| 30%                                                       | 14.5          | 8.3      | 20% lower                                                                          | 16.2          | 8.7      |
| 40%                                                       | 16.2          | 9.5      | 20% higher                                                                         | 20.9          | 13.3     |
| 60%                                                       | 21.1          | 12.6     | 40% higher                                                                         | 23.3          | 15.7     |
| 70%                                                       | 24.6          | 14.9     | <i>Training and supervision cost per episode</i>                                   |               |          |
| 80%                                                       | 29.3          | 17.9     | 40% lower                                                                          | 18.1          | 10.5     |
| <i>mRDT sensitivity (95%)</i>                             |               |          | 20% lower                                                                          | 18.3          | 10.8     |
| 80%                                                       | 36.3          | 20.7     | 20% higher                                                                         | 18.8          | 11.2     |
| 90%                                                       | 21.9          | 12.8     | 40% higher                                                                         | 19.1          | 11.5     |
| 100%                                                      | 16.0          | 9.6      | <i>Opportunity cost per day (US\$1.14)</i>                                         |               |          |
| <i>mRDT specificity (47%)</i>                             |               |          | US\$0.00                                                                           | 18.6          | 14.6     |
| 60%                                                       | 12.3          | 7.1      | US\$0.50                                                                           | 18.6          | 13.0     |
| 75%                                                       | 8.6           | 4.8      | US\$1.00                                                                           | 18.6          | 11.4     |
| 90%                                                       | 6.5           | 3.4      | US\$1.50                                                                           | 18.6          | 9.8      |
| 100%                                                      | 5.5           | 2.8      | US\$2.00                                                                           | 18.6          | 8.2      |
| <i>Sensitivity / specificity</i>                          |               |          | US\$2.50                                                                           | 18.6          | 6.7      |
| 100% / 40%                                                | 20.7          | 12.5     | <i>Probability of additional treatment-seeking in test-based arm (11%)</i>         |               |          |
| 90% / 50%                                                 | 19.4          | 11.3     | 5%                                                                                 | 18.6          | 10.0     |
| 80% / 60%                                                 | 18.2          | 10.0     | 20%                                                                                | 18.6          | 12.4     |
| <i>Adherence to negative mRDT result (96%)</i>            |               |          | 30%                                                                                | 18.6          | 14.0     |
| 60%                                                       | 46.5          | 28.7     | <i>Probability of additional treatment-seeking in clinical judgement arm (19%)</i> |               |          |
| 70%                                                       | 33.5          | 20.4     | 5%                                                                                 | 18.6          | 13.1     |
| 80%                                                       | 25.9          | 15.6     | 20%                                                                                | 18.6          | 10.9     |
| 90%                                                       | 21.0          | 12.5     | 30%                                                                                | 18.6          | 9.4      |
| 100%                                                      | 17.6          | 10.3     | <i>Various household costs per episode</i>                                         |               |          |
| <i>mRDT price (US\$0.82)</i>                              |               |          | Special food equal by arm                                                          | 18.6          | 13.6     |
| US\$0.20                                                  | 13.6          | 6.0      | Days lost equal by arm                                                             | 18.6          | 14.3     |
| US\$0.40                                                  | 15.1          | 7.5      |                                                                                    |               |          |
| US\$0.60                                                  | 16.6          | 9.0      |                                                                                    |               |          |
| <i>ACT price (US\$1.32)</i>                               |               |          |                                                                                    |               |          |
| US\$0.80                                                  | 18.9          | 11.3     |                                                                                    |               |          |
| US\$1.00                                                  | 18.8          | 11.2     |                                                                                    |               |          |
| US\$1.20                                                  | 18.7          | 11.1     |                                                                                    |               |          |

<sup>&</sup> Central parameter values are shown in parentheses.

doi:10.1371/journal.pone.0170848.t001

## Reference

1. Tawiah T, Hansen KS, Baiden F, Bruce J, Tivura M, Delimini R, et al. (2016) Cost-Effectiveness Analysis of Test-Based versus Presumptive Treatment of Uncomplicated Malaria in Children under Five Years in an Area of High Transmission in Central Ghana. PLoS ONE 11(10): e0164055. doi: [10.1371/journal.pone.0164055](https://doi.org/10.1371/journal.pone.0164055) PMID: 27695130
